# Supplementary material
Source: Springer Nature journal article supplement (https://www.springermedizin.de/resource/supplementary/13046_2013_725_MOESM3_ESM.pdf/9662816)
Supplement: MOESM3 [file 9662816]

|            | TNMstage         | NRAS | BRAF  | PTEN | GNAQ (exon 4-5) |
|------------|------------------|------|-------|------|-----------------|
| melanoma 1 | lung met         | wt   | V600E | wt   | wt              |
| melanoma 2 | lung met         | wt   | V600E | wt   | wt              |
| melanoma 3 | lung met         | wt   | WT    | wt   | wt              |
| melanoma 4 | Lymph node met   | wt   | V600E | wt   | wt              |
| melanoma 5 | Subcutaneous met | wt   | V600K | wt   | wt              |
| melanoma 6 | Subcutaneous met | wt   | WT    | wt   | wt              |
| melanoma 7 | Subcutaneous met | wt   | WT    | wt   | wt              |
| melanoma 8 | Subcutaneous met | wt   | V600K | wt   | wt              |
